# Supplementary material for: l-Dopa and dopamine conjugated naphthalenediimides modulate amyloid β toxicity
Source: Royal Society of Chemistry journal article supplement (doi:10.1039/c8ob01691g), 2018-01-01
Supplement: c8ob01691g1.pdf [file c8ob01691g1.pdf]

## Electronic supplementary information

### **L-Dopa and dopamine conjugated naphthalenediimides modulate amyloid $\beta$ toxicity**

Madhu Ramesh,<sup>a,†</sup> Pandeewar Makam,<sup>a,†</sup> Chandrashekhara Voshavar,<sup>a,†</sup> Harshavardhan Khare,<sup>b</sup> Kolla Rajasekhara,<sup>a</sup> Suryanarayanan Ramakumar,<sup>b</sup> Thimmaiah Govindaraju<sup>a\*</sup>

<sup>a</sup>Bioorganic Chemistry Laboratory, New Chemistry Unit, Jawaharlal Nehru Centre for Advanced Scientific Research, Jakkur P.O., Bengaluru 560064, Karnataka, India. E-mail: tgraju@jncasr.ac.in.

<sup>b</sup>Department of Physics, Indian Institute of Science, Bengaluru 560012, India.

<sup>†</sup> These authors contributed equally.

**Synthesis of amyloid beta (A $\beta$ 11-25) peptide.** A $\beta$ 11-25 (EVHHQKLVFFAEDVG) peptide was synthesized following standard 9-fluorenylmethoxycarbonyl (Fmoc) chemistry on an automated peptide synthesiser (Syro II, MultiSynTech). Rink amide resin (Novabiochem) was used as a solid support in the synthesis. Amino acids were coupled using HBTU as the activating reagent, DIPEA in DMF. For the deprotection of Fmoc 40% piperidine in DMF was used. The peptide was purified using a reverse-phase (RP) preparative HPLC on C18 column at 40 °C. Product purity was greater than 95%, as ascertained by analytical HPLC. The molecular mass of the peptide was verified by HRMS (Q-TOF) (Agilent 6538 UHD HRMS/Q-TOF) analysis.

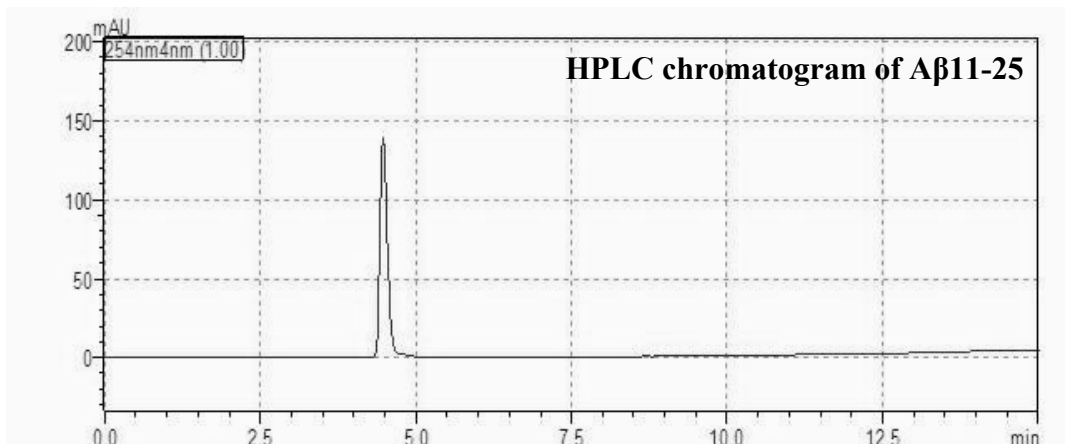

HPLC Conditions:

**System:** Shimadzu HPLC, **Column:** Phenomenex, RP-C18 (5 $\mu$ m, 4.6  $\times$  250 mm)  
**Mobile Phase:** Water:ACN, 70:30, v/v with 0.1% TFA, **Injection Volume:** 15  $\mu$ L  
**Flow Rate:** 0.8 mL/min, **Run Time:** 15 min, **Typical Column Pressure:** 65-70 Bar  
**Detection:** PDA detector

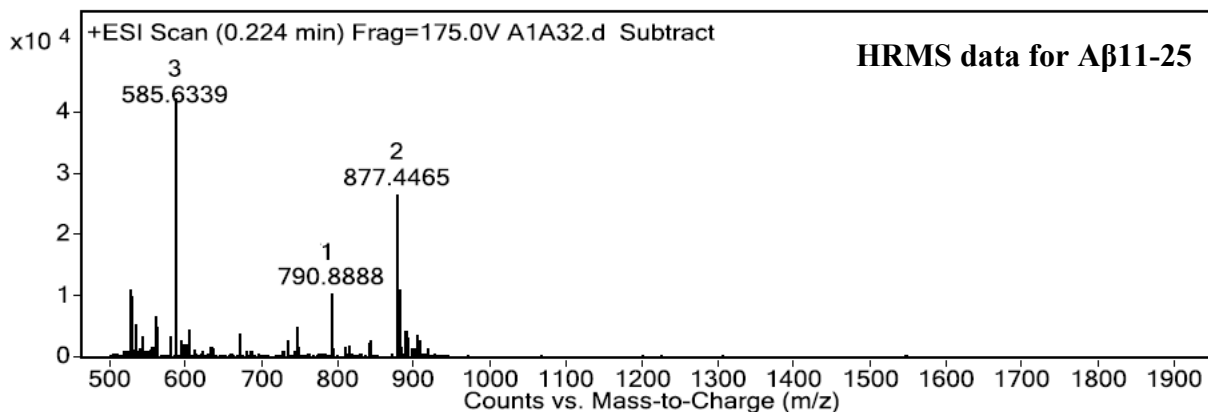

The calculated molecular weight of A $\beta$ 11-25  $[(M+2H) / 2]^{+2} = 877.4445$  obtained mass = 877.4465

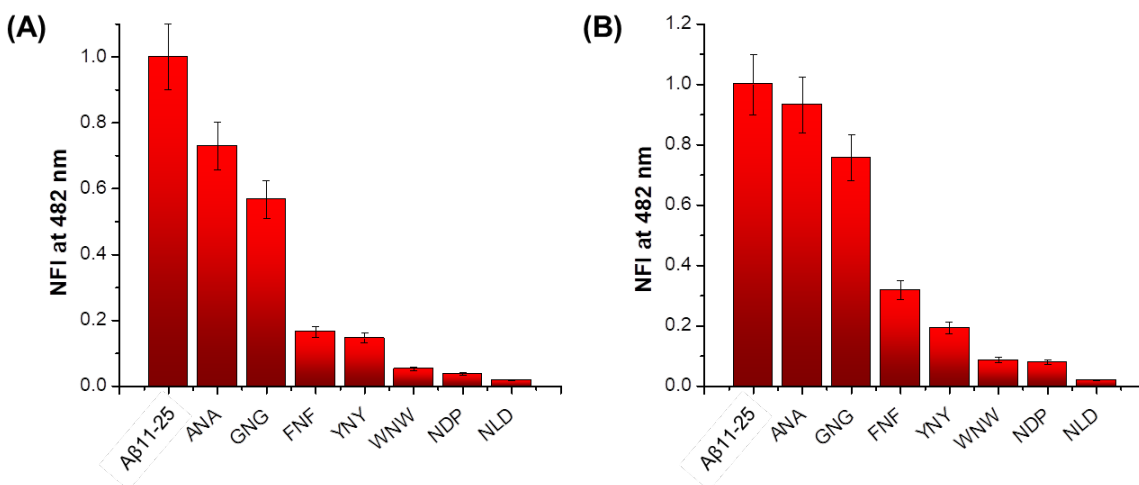

**Fig. S1** ThT fluorescence assay. (A) Effects of NDI conjugates on the aggregation of Aβ11-25 (200 μM) after 48 h incubation at 1:1 molar ratios of Aβ11-25:NDI conjugate and the plot of ThT fluorescence intensity at 482 nm as a function of NDI conjugates (ANA, GNG, FNF, YNY, WNW, NDP and NLD). (B) Effects of NDI conjugates on the disaggregation of Aβ11-25 (200 μM) pre-formed aggregates (after 48 h incubation) and further incubation for 24 h at 1:1 molar ratios of Aβ11-25: NDI conjugate. The normalized fluorescence intensity (NFI) of ThT at 482 nm in presence of Aβ11-25 (control) and upon treatment with NDI conjugates.

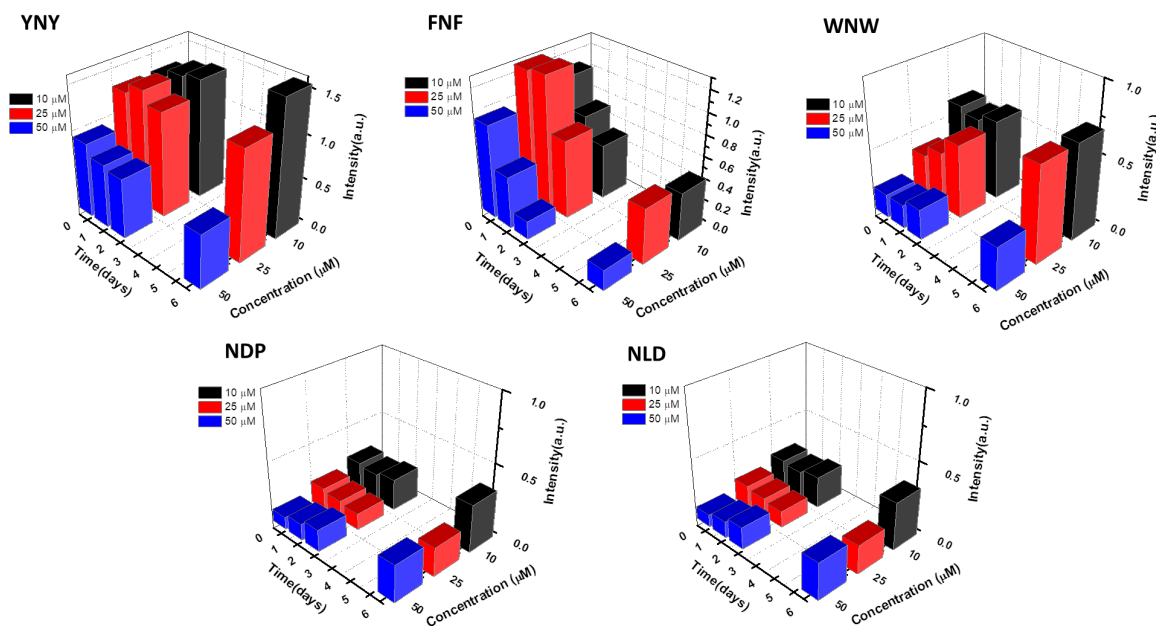

**Fig. S2** ThT fluorescence assay for the time and concentration-dependent dissolution of Aβ11-25 aggregates with NDI conjugates (YNY, FNF, WNW, NDP and NLD).

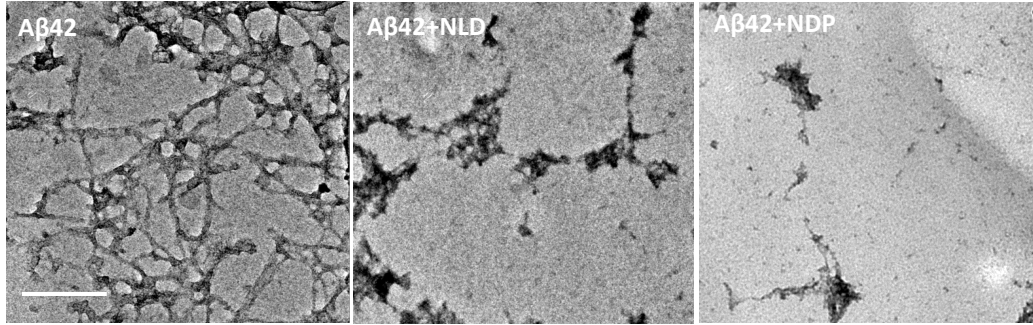

**Fig. S3** Transmission electron microscopy (TEM) study to evaluate the effect of NDP and NLD on A $\beta$ 42 aggregation. NDP and NLD were incubated with 20  $\mu$ M of A $\beta$ 42 monomer at 37  $^{\circ}$ C in 1:1 (A $\beta$ 42:NDI modulator) stoichiometry for 24 h and the samples were visualised under TEM.

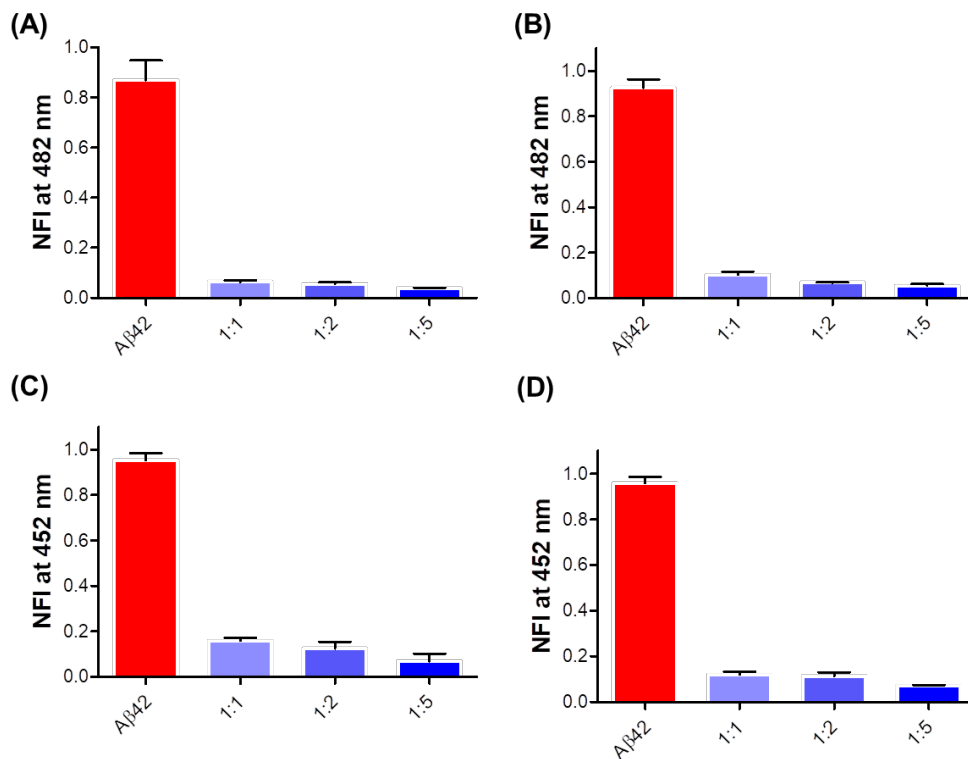

**Fig. S4** Inhibition of A $\beta$ 42 aggregation (50  $\mu$ M) with NDP (A) and NLD (B) by ThT assay. Dissolution of pre-formed A $\beta$ 42 aggregates (50  $\mu$ M) with NDP (C) and NLD (D) by ThT assay. Values are the normalized fluorescence intensity (NFI) at 482 nm compared to that of the control (A $\beta$ 42).

## In silico docking protocols

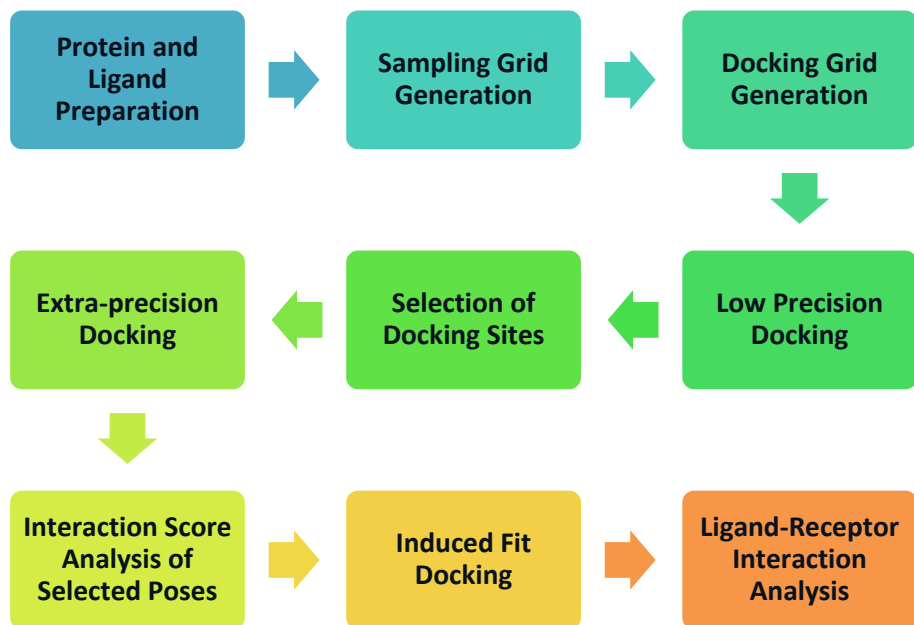

## Protocol for blind docking

1. Receptor was prepared by adding missing hydrogen atoms followed by short minimization using OPLS 2005 force field.
  2. Python scripts were written to wrap the receptor in a rectangular grid with equispaced points. The spacing between the points should be such that the inner boxes of docking grid do not intersect. (Please refer to the Schrödinger Software documentation for the definitions of inner and outer box used in Glide docking protocol.) In our case, the inner box size was taken as the spacing between the points (5 Å). This rectangular grid can be viewed as a collection of cubic cells of 5 Å sides. The centroids of these cells are considered as sampling points on which the docking grids were generated in the next step. Filtering is performed such that every sampling point has at least one receptor atom in any of the 26 neighbouring cells and at least one of the 26 neighbouring cells is empty. This ensures that the retained sampling points are near the surface of the receptor and not inside the receptor at the same time.
  3. Docking grids were generated for all the sampling points.
  4. Ligand was prepared for docking.
  5. Docking was performed for all the grids in batch mode using xglide script in Schrödinger software suite.
  6. Ensemble of multiple poses corresponding to every grid was generated.
- Following is the pictorial representation of this protocol.

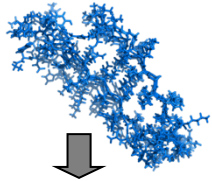

Amyloid  $\beta$  structure stick model (viewing down the fibril axis)

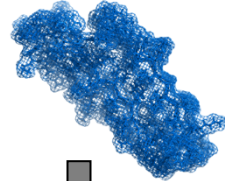

Surface representation of amyloid  $\beta$  structure

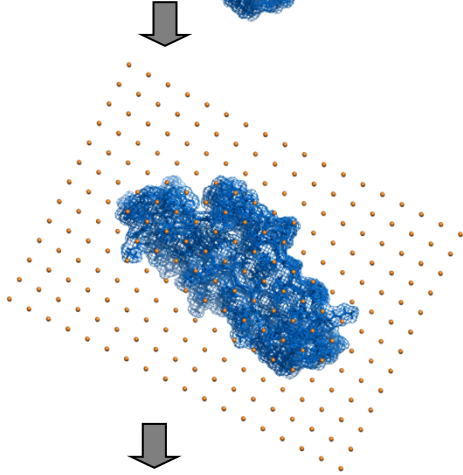

Amyloid beta structure is wrapped in a rectangular grid with equispaced sampling points.

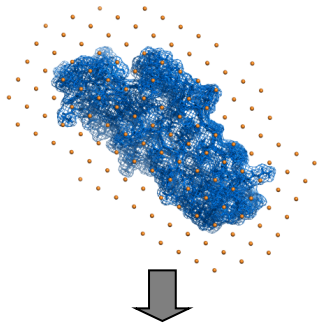

Extra sampling points are removed based on the criteria described in the protocol (Refer the protocol given above).

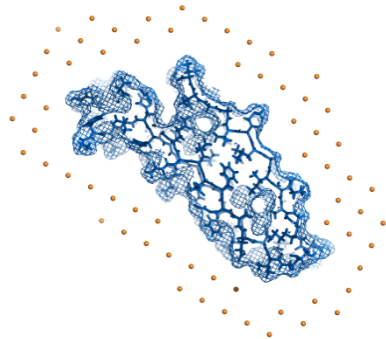

A section of amyloid  $\beta$  structure embedded in the grid showing correct wrapping of the receptor in the sampling grid.

**Blind docking results.** Multiple docked poses obtained with different scores. (Amyloid beta receptor is shown as yellow sphere model.)

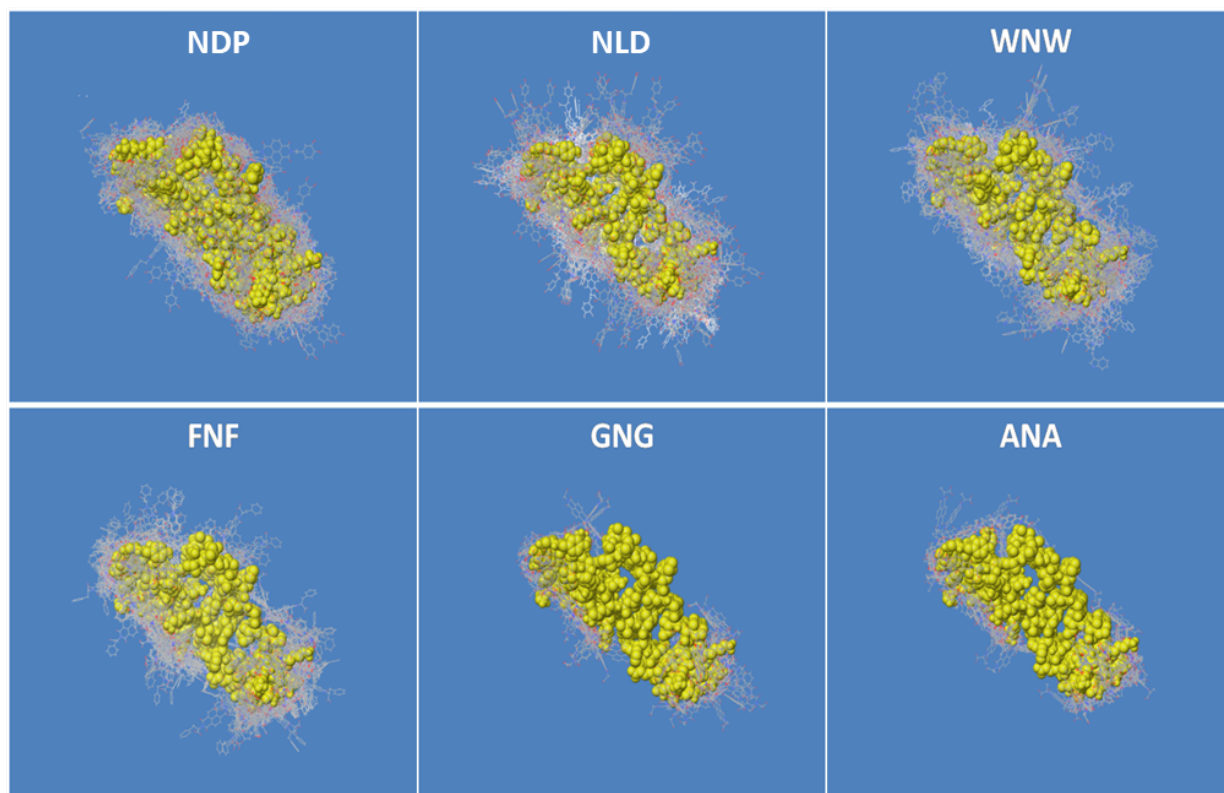

**Table S1.** XP docking scores for IIGLM region

| Inhibitor | XP docking score |
|-----------|------------------|
| NDP       | -6.95            |
| NLD       | -8.37            |
| WNW       | -5.29            |
| FNF       | -5.10            |
| GNG       |                  |
| ANA       |                  |

**Table S2.** XP docking scores for KLVFFA region

| Inhibitor | XP docking score |
|-----------|------------------|
| NDP       | -3.18            |
| NLD       | -6.67            |
| WNW       | -5.56            |
| FNF       | -5.17            |
| GNG       | -4.81            |
| ANA       | -4.21            |

**IFD scores.** To quantitatively test whether experimental results match with the computational docking results, we have calculated the correlation of the docking scores with the experimental aggregation inhibition. The docking scores and normalized fluorescence intensities of ThT assays of aggregation inhibition were examined for the correlation analysis. Pearson's correlation coefficient and Spearman's rank-order correlation coefficient were calculated. As can be seen in Table S3, the docking scores for the IIGLM region show good correlation with the experimental results of A $\beta$  fibril induced fit docking (IFD) scores. However, the IFD scores for KLVFFA site seem to be poorly correlated with the experimental results. The reason for this is the inconsistent docking score of NDP, which shows poor IFD score for KLVFFA region despite being a good inhibitor of A $\beta$  aggregation in vitro. The correlation coefficients calculated excluding NDP are shown in Table S4. Note the distinct increase in both Pearson's and Spearman's correlation coefficients for KLVFFA after excluding NDP. Overall, the correlation analysis indicates validity of the agreement between computational docking and experimental results.

**Table S3** IFD scores for IIGLM and KLVFFA regions

| Ligand Name                                                        | Docking score for IIGLM | Docking score for KLVFFA | Experimental results |
|--------------------------------------------------------------------|-------------------------|--------------------------|----------------------|
| NLD                                                                | -365.03                 | -363.82                  | 0.091                |
| NDP                                                                | -362.54                 | -355                     | 0.086                |
| WNW                                                                | -360.4                  | -359.69                  | 0.359                |
| FNF                                                                | -351.7                  | -360.81                  | 0.553                |
| ANA                                                                | 0                       | -356.56                  | 0.897                |
| GNG                                                                | 0                       | -355.89                  | NA                   |
| <b>Pearson's correlation with experimental results</b>             | <b>0.83</b>             | <b>0.25</b>              |                      |
| <b>Spearman's rank-order correlation with experimental results</b> | <b>1.00</b>             | <b>-0.10</b>             |                      |



**Table S4** IFD scores for IIGLM and KLVFFA regions excluding NDP

| Ligand Name                                                        | Docking score for IIGLM | Docking score for KLVFFA | Experimental results |
|--------------------------------------------------------------------|-------------------------|--------------------------|----------------------|
| NLD                                                                | -365.03                 | -363.82                  | 0.091                |
| WNW                                                                | -360.4                  | -359.69                  | 0.359                |
| FNF                                                                | -351.7                  | -360.81                  | 0.553                |
| ANA                                                                | 0                       | -356.56                  | 0.897                |
| GNG                                                                | 0                       | -355.89                  | NA                   |
| <b>Pearson's correlation with experimental results</b>             | <b>0.85</b>             | <b>0.92</b>              |                      |
| <b>Spearman's rank-order correlation with experimental results</b> | <b>1.00</b>             | <b>0.80</b>              |                      |

**Docking with 2BEG.** PDB ID 2BEG is solid state NMR structure of A $\beta$ 1-42. Although being full length construct, the refined residues are only leucine 17 onwards. Moreover the number of refined chains is 5 which is less than other two structures 2LMO and 2LMN. All the ligands were docked with 2BEG to confirm the problems with insufficient number of refined chains and missing lysine at position 16.

**Table S5.** XP docking scores for PDB ID 2BEG

| Inhibitor | IIGLM | KLVFFA |
|-----------|-------|--------|
| NDP       | -3.66 | -4.20  |
| NLD       | -4.68 | -3.92  |
| WNW       | -3.47 | -2.07  |
| FNF       | -1.52 | -0.85  |
| GNG       | -2.99 |        |
| ANA       |       |        |

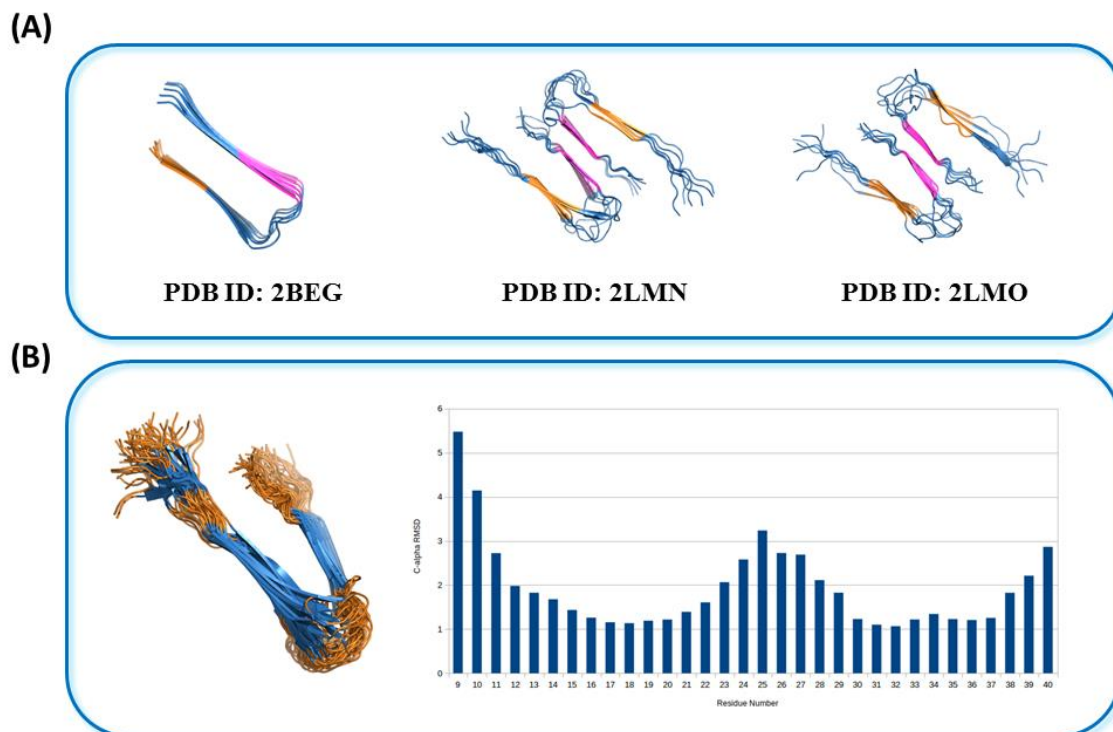

**Fig. S5** (A) A $\beta$ 42 structures obtained from protein data bank. (B) Residue-wise C- $\alpha$  RMSD for chains A to F of NMR structure 2LMN.

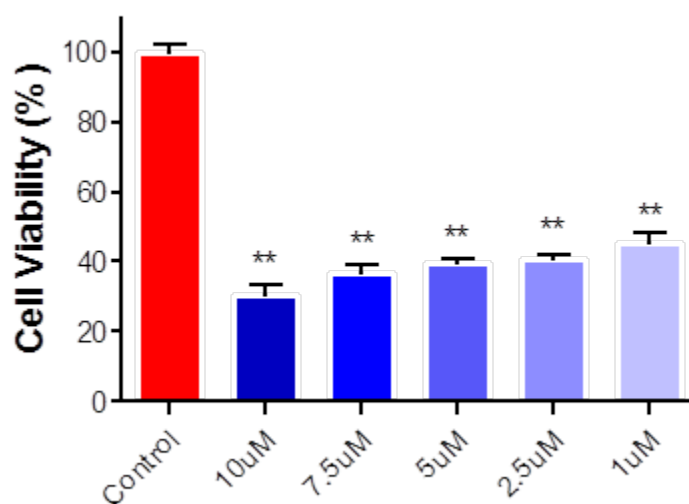

**Fig. S6** Concentration-dependent toxicity (1-10  $\mu$ M) exhibited by A $\beta$ 42 aggregates on cell viability of PC12 cells.

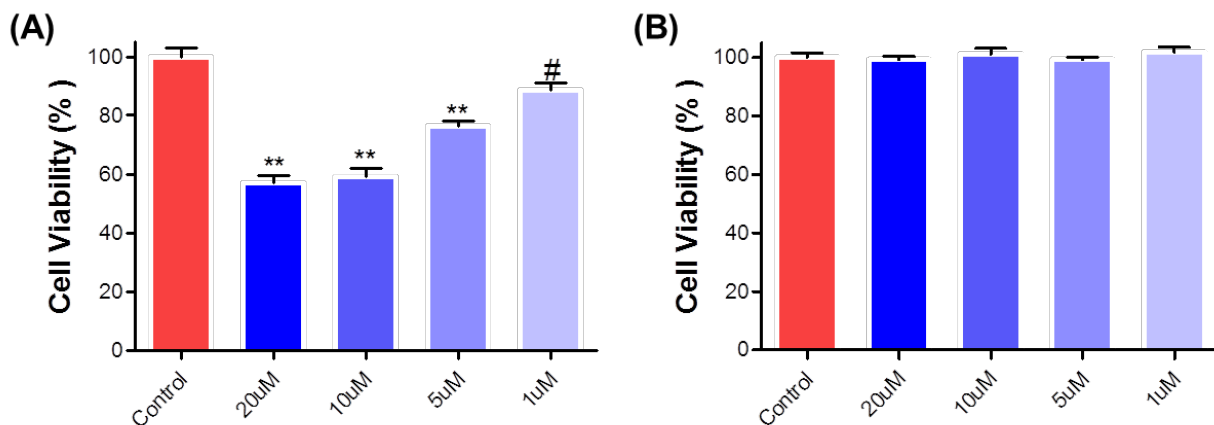

**Fig. S7** Effect of NDI modulators on the cell viability of PC12 cells. PC12 cells were incubated with 1, 5, 10 and 20  $\mu\text{M}$  of either **NDP** (A) or **NLD** (B) for 24 h. Values shown are means  $\pm$  SEM of three independent experiments performed in six to eight replicates. One-way ANOVA analysis followed by Tukey's multiple comparison post hoc test was performed (# $p < 0.05$ , \*\* $p < 0.001$  compared to control).

### Specific rotations of chiral NDI conjugates

Specific rotation of NDI conjugates at 20 °C in DMSO at concentration of 0.01  $\text{gml}^{-1}$  ( $[\alpha]_{\text{D}}^{20}$  (c, 0.01, DMSO))

| Compound                                        | <b>ANA</b> | <b>WNW</b> | <b>YNY</b> | <b>FNF</b> | <b>NLD</b> |
|-------------------------------------------------|------------|------------|------------|------------|------------|
| Specific Rotation<br>$[\alpha]_{\text{D}}^{20}$ | -77.7      | -363.64    | -307.06    | -301.34    | -318.84    |

## $^1\text{H}$ and $^{13}\text{C}$ NMR spectra

ANA, FNF and WNW were synthesised and characterised following the reported procedure.<sup>1</sup>

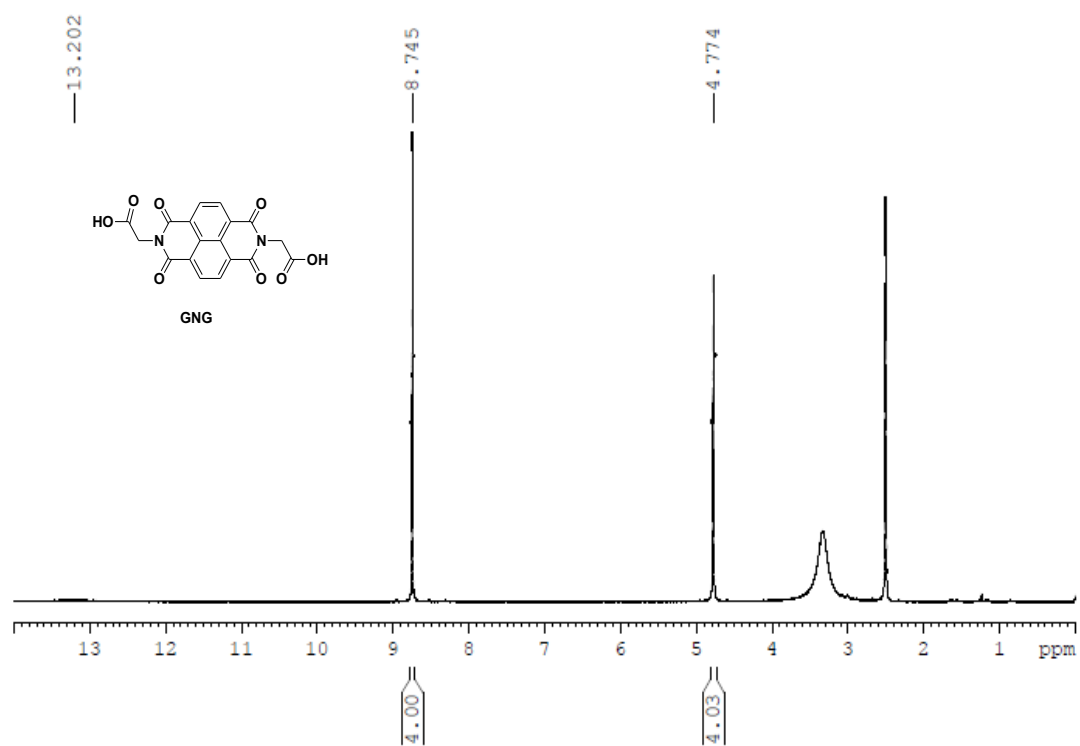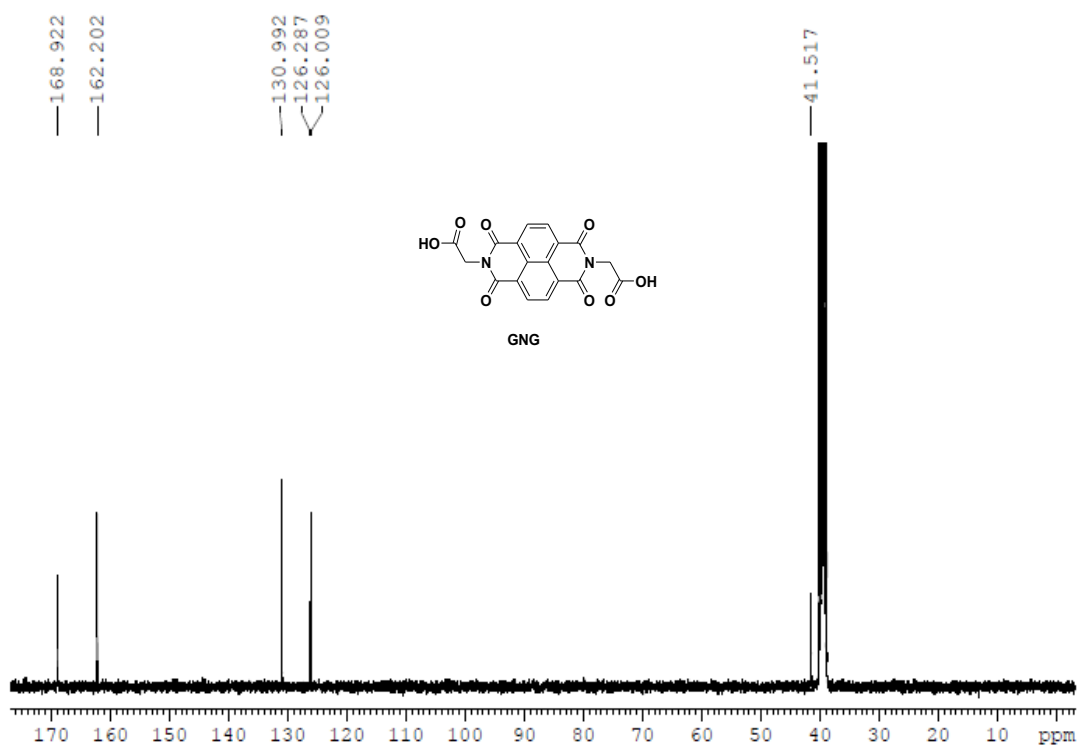

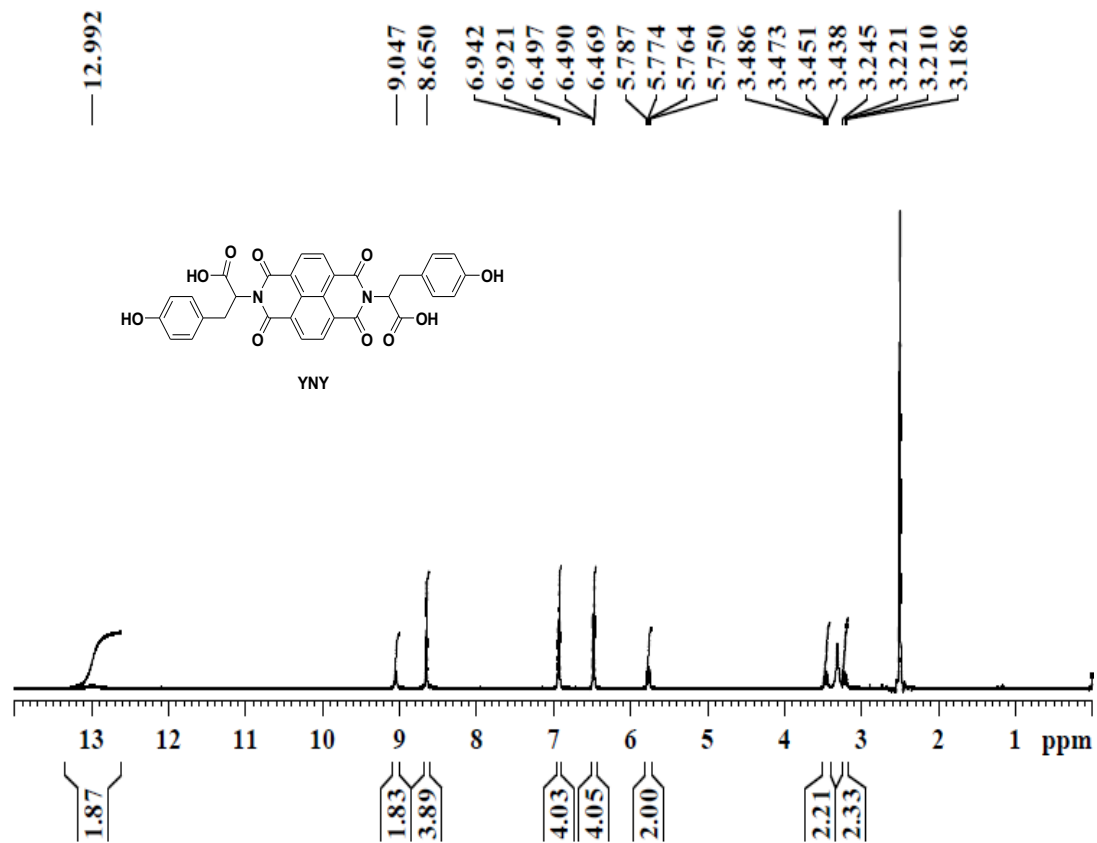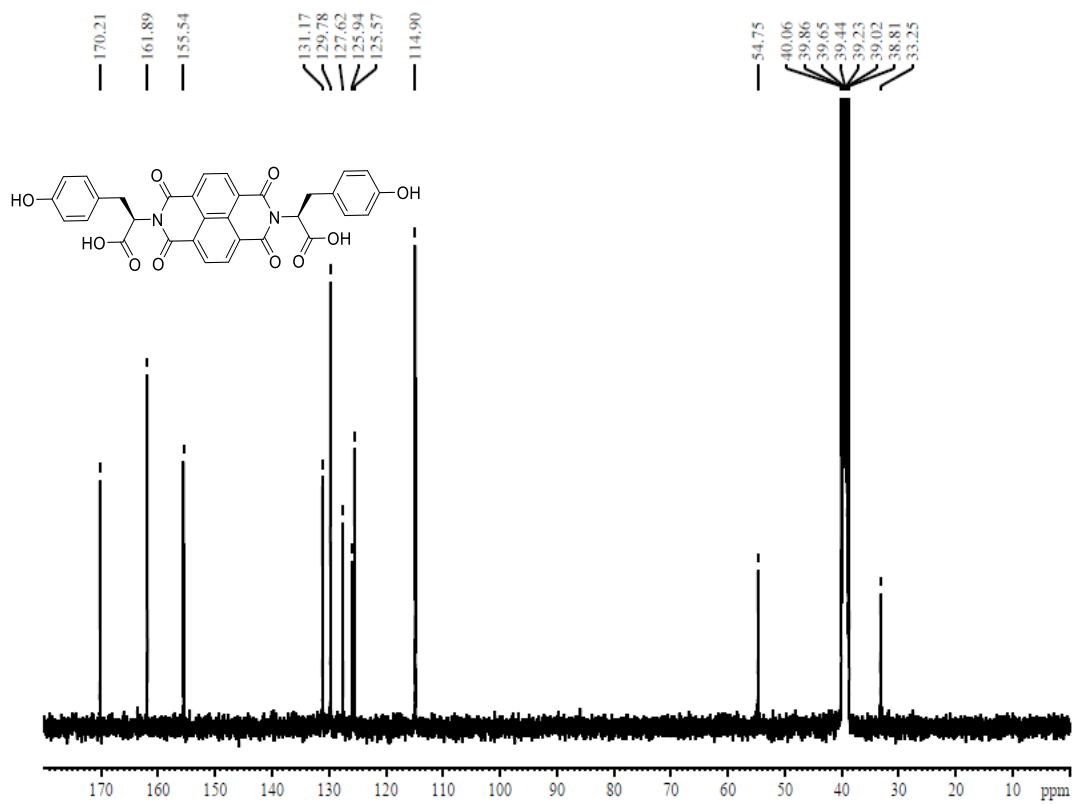

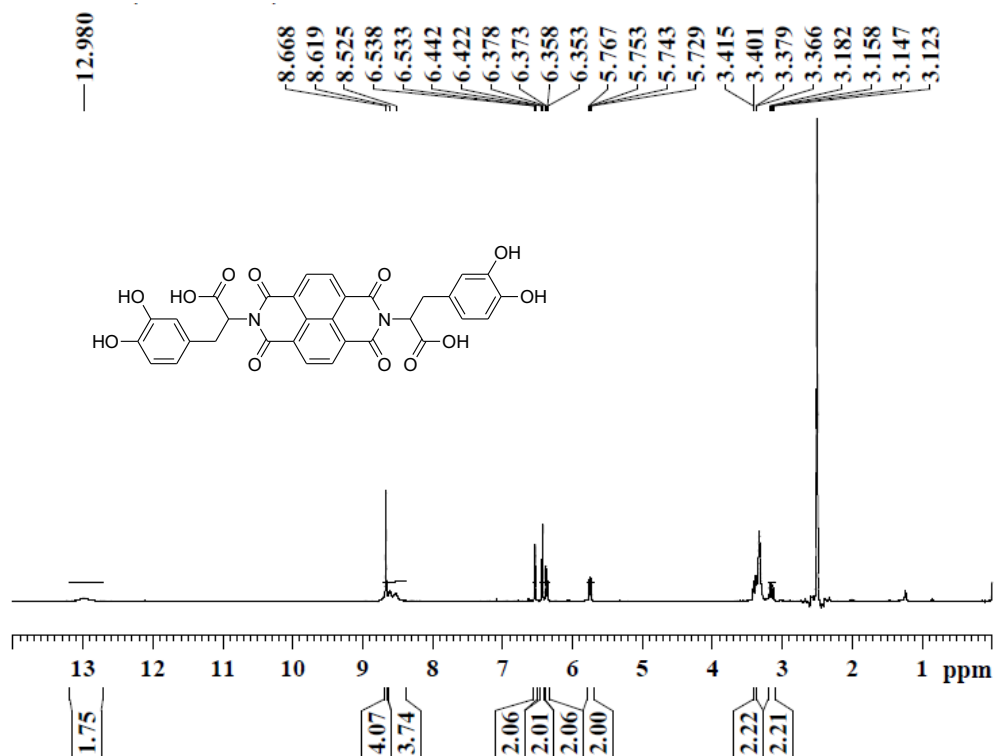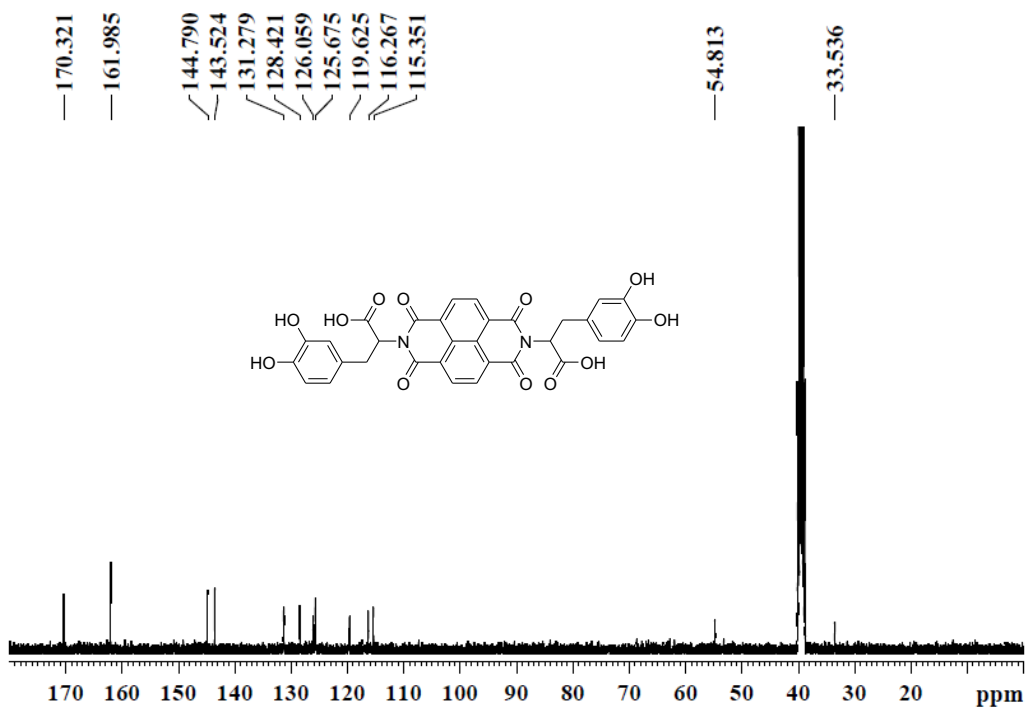

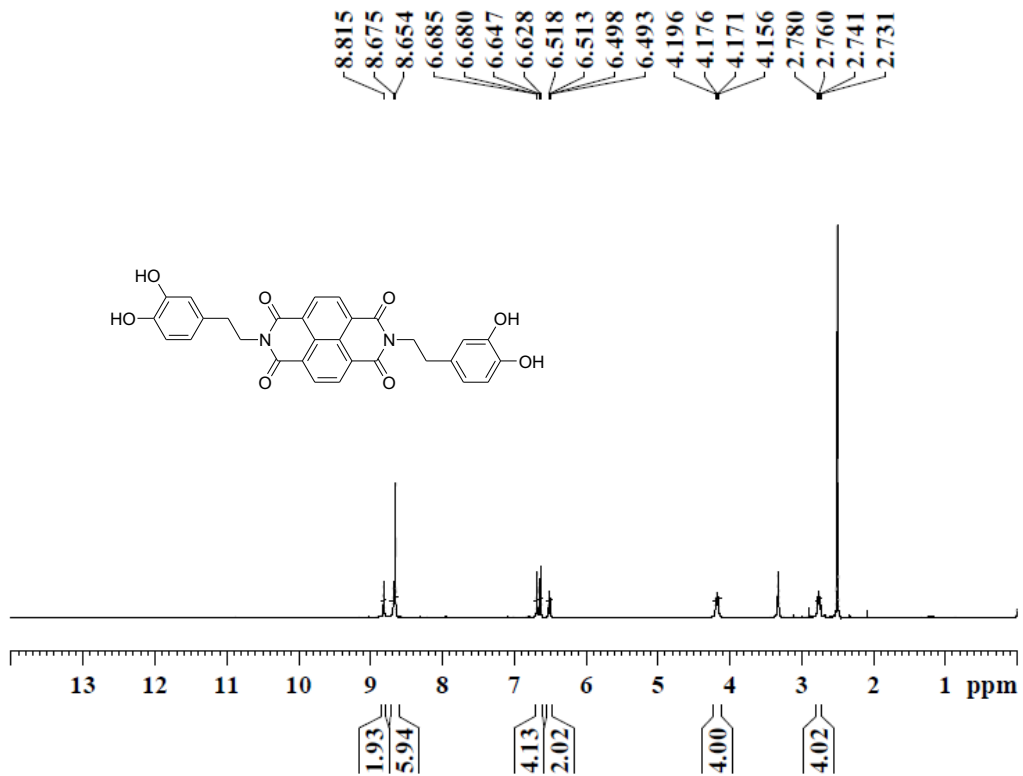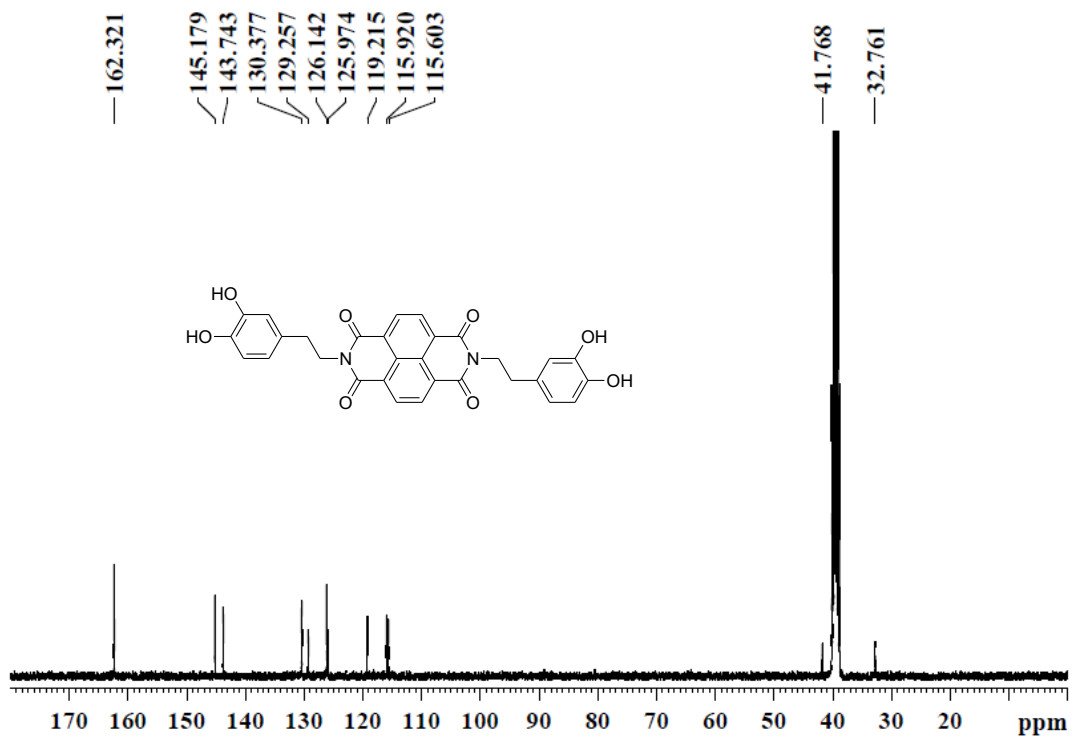

## Reference

1. M. Pandeewar, H. Khare, S. Ramakumar and T. Govindaraju, *RSC Adv.*, 2014, **4**, 20154-20163.
